# Supplementary material
Source: publisher figshare collection journal article supplement (https://acs.figshare.com/ndownloader/files/3762970)
Supplement: Supplementary file 1 [file 3762970]

# A combined SAXS/SANS study for the *in situ* characterization of ligand shells on small nanoparticles - The case of ZnO

T. Schindler, M. Schmiele, T. Schmutzler, T. Kassar, D. Segets, W. Peukert, A. Radulescu, A. Kriele, R. Gilles, T. Unruh\*

\*corresponding author:

Prof. Dr. Tobias Unruh

Staudtstr. 3

91058 Erlangen

Email: tobias.unruh@fau.de

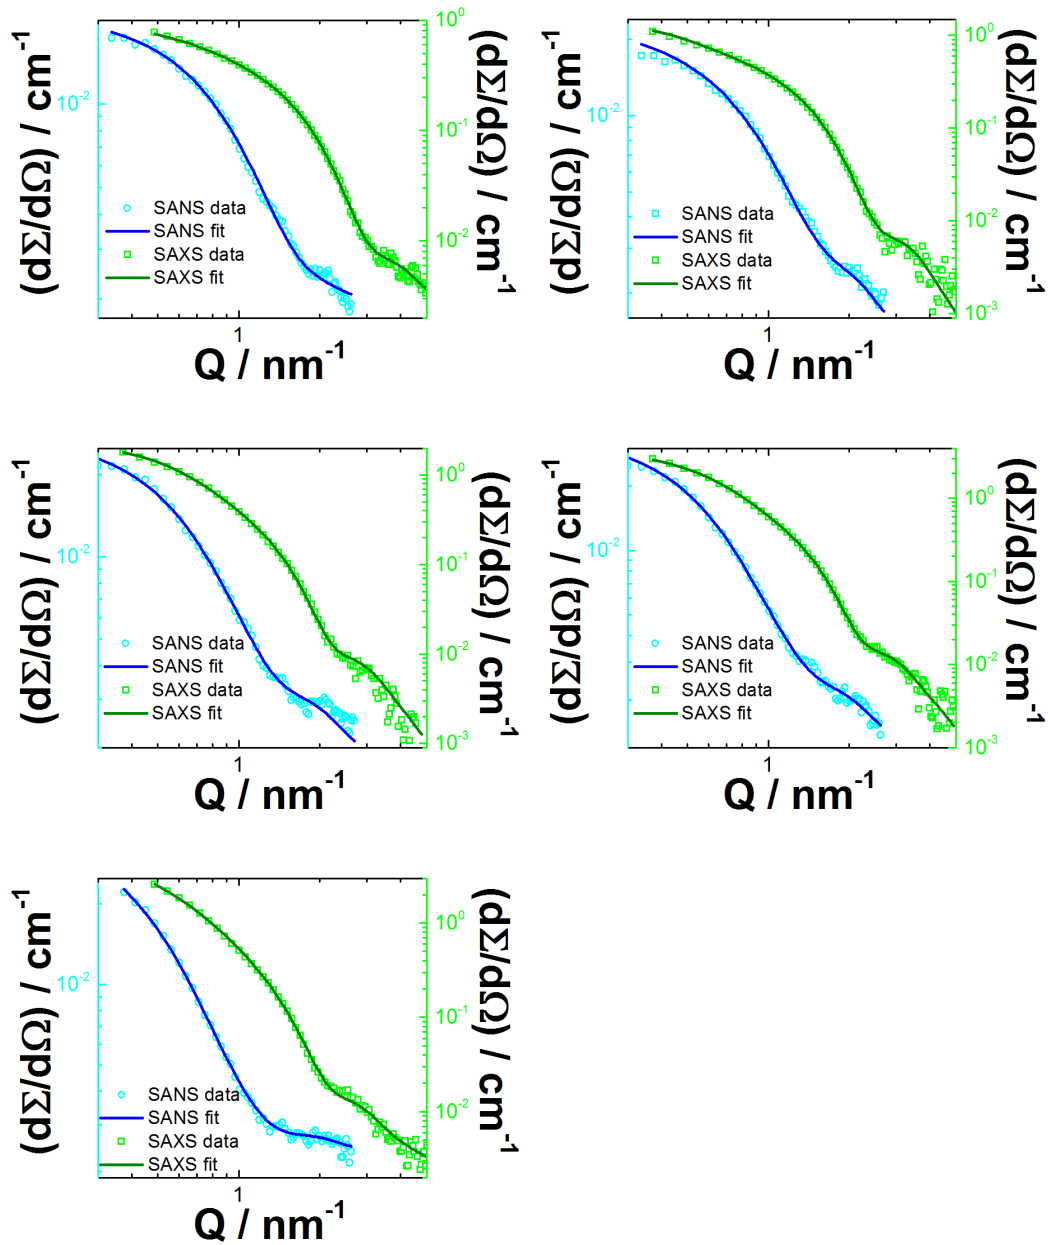

Figure S1: SAXS and SANS pattern of sample A (top left), B (top right), C (middle left), D (middle right) and sample E (bottom). The data is shown in a way that the complete extension of the different pattern can be seen.

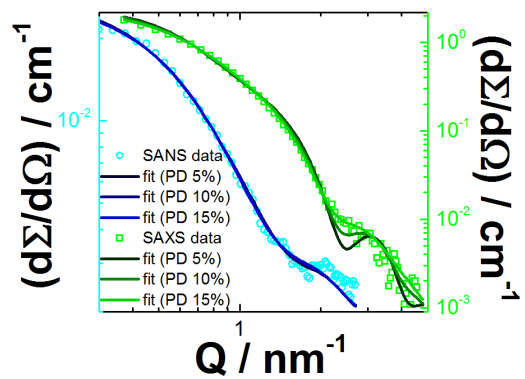

Figure S2: Comparison of different polydispersities for the main fraction shown for sample C.

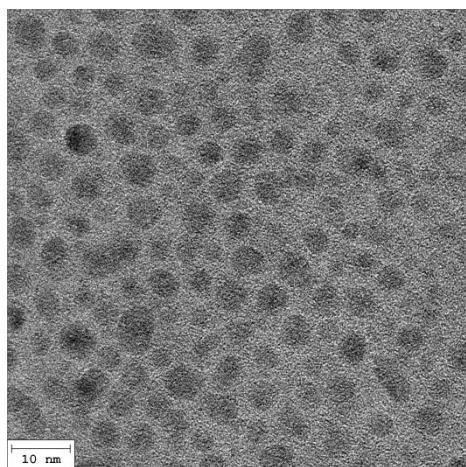

Figure S3: TEM image of ZnO nanoparticles.
